# Supplementary material for: Phylogenomic Analyses Reveal the Evolutionary Origin of the Inhibin α-Subunit, a Unique TGFβ Superfamily Antagonist
Source: PubMed Central journal article supplement (PMC2832003; doi:10.1371/journal.pone.0009457), 2010-03-04

**Fig S3. Detailed version of the inhibin/activin phylogeny presented in Fig. 1C.** The ML analysis used the JTT+ $\Gamma$ +invariant sites model, as described in the text. Support for specific groups reflects the percentage of 100 bootstrap replicates (only values  $\geq 50\%$ ). The version in the text indicates the occurrence of indel mutations, including the indels shown to have a major functional impact.

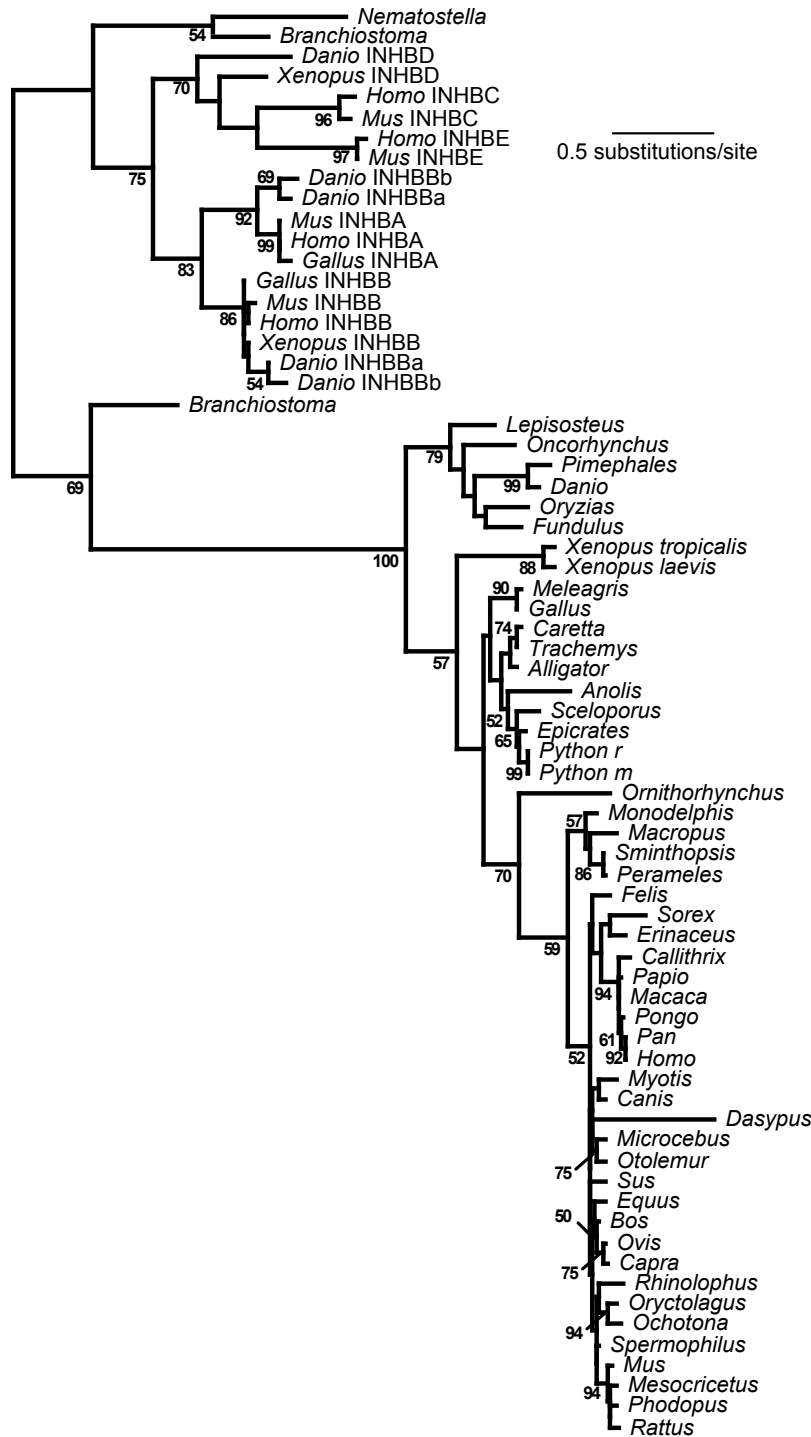

Supplement: pone.0009457.s003.pdf [file pone.0009457.s003.pdf]
