# Supplementary material for: Phylogenomic Analyses Reveal the Evolutionary Origin of the Inhibin α-Subunit, a Unique TGFβ Superfamily Antagonist
Source: PubMed Central journal article supplement (PMC2832003; doi:10.1371/journal.pone.0009457), 2010-03-04
Supplement: pone.0009457.s004.pdf [file pone.0009457.s004.pdf]

**Figure S4. Detail of mutations within human inhibin  $\alpha$ C and  $\beta$ A-subunits. A)** The schematic representation of wild-type human  $\alpha$ C and human  $\beta$ A-subunits. The letters “A,” “B,” “C,” “D,” “E” and “F” denote the six candidate regions targeted for deletion. **B)** The residue numbers and sequences for the six regions targeted for deletion and used for generating the inhibin  $\alpha$ -subunit deletion mutants and inhibin  $\beta$ A-subunit chimera mutants. **C)** Design and naming conventions for the  $\alpha$ -subunit and  $\beta$ A-subunit mutants.

**A**

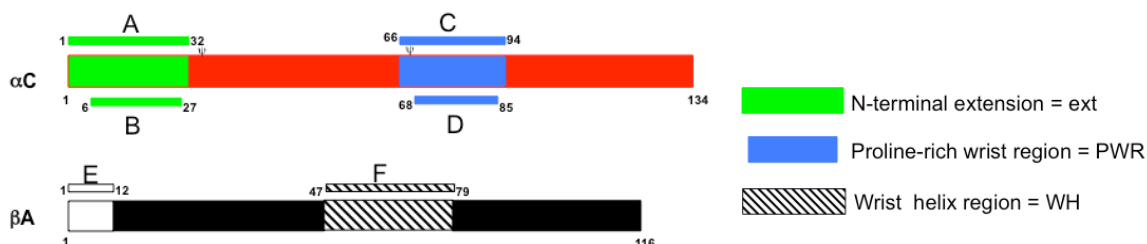

**B**

| Region | Amino acid location | Sequence                          |
|--------|---------------------|-----------------------------------|
| A      | 1-32                | STPLMSWPWSPSALRLLQRPPEEPAAHANCHR  |
| B      | $\alpha$ 6-27       | SWPWSPSALRLLQRPPEEPAAH            |
| C      | 66-94               | HIPPNLSLPVPGAPPTPAQPYSLLPGAQP     |
| D      | 68-85               | PPNLSLPVPGAPPTPAQP                |
| E      | $\beta$ A 1-12      | GLECDGKVNICC                      |
| F      | 47-79               | HIAGTSGSSLSFHSTVINQYRLRGHNPFANLKS |

**C**

| Wild type inhibinA      | mutants                           | mutants detail                                       |
|-------------------------|-----------------------------------|------------------------------------------------------|
| $\alpha^{Hwt}/\beta A$  | $\alpha^{Hext-}/\beta A$          | Remove region “B”,heterodimer with $\beta A$         |
| $\alpha^{Chwt}/\beta A$ | $\alpha^{Hwr-}/\beta A$           | Remove region “D”,heterodimer with $\beta A$         |
| $\beta A/\beta A$       | $\alpha^{Hext-wr-}/\beta A$       | Remove region “B” and “D”,heterodimer with $\beta A$ |
|                         | $\beta A^{Hext+}/\beta A^{Hext+}$ | Replace region “E” with region “A”                   |
|                         | $\beta A^{Hwr+}/\beta A^{Hwr+}$   | Replace region “F” with region “C”                   |
|                         | $\beta A^{HD}/\beta A^{HD}$       | Remove region “F”                                    |

Note: H=human, Ch=chicken, wt=wildtype, ext=extension region, wr=wrist region, HD=Helix deletion
