# Supplementary material for: Phylogenomic Analyses Reveal the Evolutionary Origin of the Inhibin α-Subunit, a Unique TGFβ Superfamily Antagonist
Source: PubMed Central journal article supplement (PMC2832003; doi:10.1371/journal.pone.0009457), 2010-03-04
Supplement: pone.0009457.s005.pdf [file pone.0009457.s005.pdf]

**Figure S5. Negative control for the Fig 3B and Tandem MS-MS fragment mass mapping.**

**A)** Left, immunoblot of media from cells expressing wild type human  $\alpha$ -subunit alone and human inhibin A under non-reducing or reducing conditions. Middle, immunoblot of media from cells expressing human free  $\alpha$  or human inhibin A that were labeled with [<sup>35</sup>S]-cysteine for 48 hours. Media were collected and immunoprecipitated with an anti- $\alpha$ -subunit monoclonal antibody PO23 and then subjected to SDS-PAGE under non-reducing conditions and autoradiography. Right, negative control immunoblot of mouse IgG-immunoprecipitated [<sup>35</sup>S]-cysteine labeled media. Labels 1, 2, 3 and 4 indicate media from cells expressing  $\alpha^{\text{Hwt}}/\alpha^{\text{Hwt}}$ ,  $\alpha^{\text{Hwt}}/\beta\text{A}$ ,  $\alpha^{\text{Chwt}}/\alpha^{\text{Chwt}}$  and  $\alpha^{\text{Chwt}}$ , respectively. **B)** The culture media from the chicken  $\alpha$ -subunit alone expression cell was collected and immunoprecipitated with an anti- $\alpha$ -subunit monoclonal antibody PO23 and subjected to SDS-PAGE under non-reducing conditions. The gel was stained with Coomassie. The band marked with “\*” is supposed chicken  $\alpha$ - $\alpha$  homodimer band. The molecular weight is around 30kDa. **C)** The band was digested with MS grade trypsin and subjected to tandem MS-MS analysis. Using the SwissProt database, the resulting fragment from the band mapped to the chicken inhibin  $\alpha$ -subunit mature domain. The matched fragment is highlighted in red.

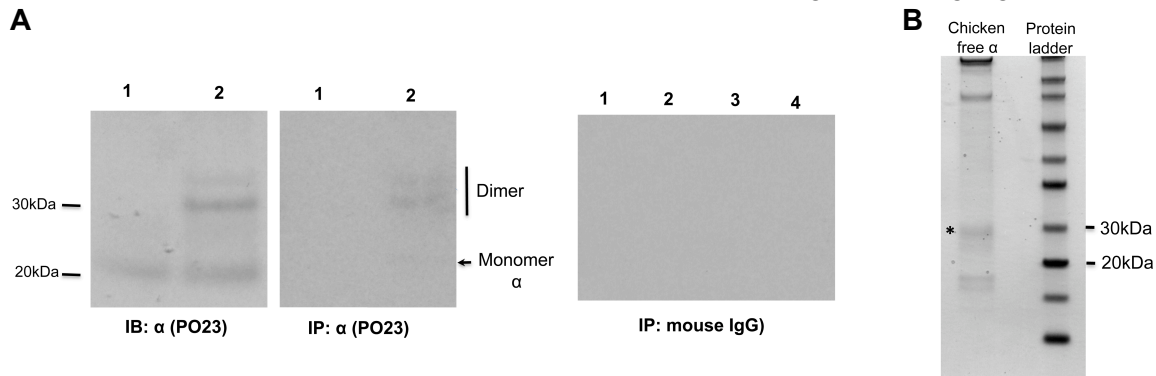

**Chicken inhibin a full length sequence:**

MLLLHLLPAVLPAALGSGCTGAGADRQLVLAKVRARVLEHLSPAMQEPQKDVRR  
VHRRDVLEEVEVPPEEQEDTSQVILFPSTDVPCEPTQPKLLEEGIFTYLFQPSA  
HALSRTLTSALQWFYSGPSAAPNHSAPAVLTLSPQGRVPVVATASRTPHWTVFD  
GPDALPQLAQPLFVLLVRCPCPLADGDKMPFLVATTRAKAAGRARRSAVPWSPA  
ALLLQRPSEDVAAHTNCRASLNISFEELGWDNWIHPSSVFVHYCHGNCAEGHG  
LSHRLGVQLCCAALPGTMRSRLRV**RTTSDGGYS**FKYETVPNILAQDCTCV
