# Supplementary material for: Phylogenomic Analyses Reveal the Evolutionary Origin of the Inhibin α-Subunit, a Unique TGFβ Superfamily Antagonist
Source: PubMed Central journal article supplement (PMC2832003; doi:10.1371/journal.pone.0009457), 2010-03-04

**Figure S6. Immunoblots of media from cells expressing wild type human and chicken inhibin A and various human  $\alpha$ -subunit deletion mutants run under reducing conditions.** Labels 1', 2', 3', 4' and 5' indicate media from cells expressing  $\alpha^{\text{Hwt}}/\beta\text{A}$ ,  $\alpha^{\text{Chwt}}/\beta\text{A}$ ,  $\alpha^{\text{Hext-}}/\beta\text{A}$ ,  $\alpha^{\text{HPWR-}}/\beta\text{A}$  and  $\alpha^{\text{Hext-PWR-}}/\beta\text{A}$ , respectively. **A)** Blot was detected by an anti- $\alpha$ -subunit monoclonal antibody PO23. **B)** Blot was detected by anti- $\beta\text{A}$ -subunit polyclonal antibody.

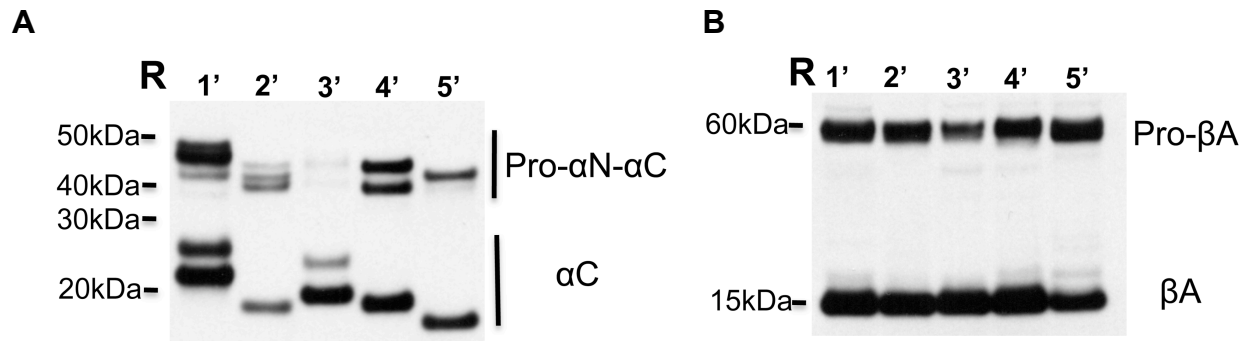

Supplement: pone.0009457.s006.pdf [file pone.0009457.s006.pdf]
