# Supplementary material for: Phylogenomic Analyses Reveal the Evolutionary Origin of the Inhibin α-Subunit, a Unique TGFβ Superfamily Antagonist
Source: PubMed Central journal article supplement (PMC2832003; doi:10.1371/journal.pone.0009457), 2010-03-04

**Figure S7. Standard curves for biotinylated activin A/inhibin A binding to ActRIIB. A)** Standard curve for biotinylated activin A;  $EC_{50}=1.10$  nM. Related to **Fig 4A**. **B)** Standard curve for biotinylated inhibin A;  $EC_{50}=2.73$  nM. Related to **Fig 4C**.

**A**

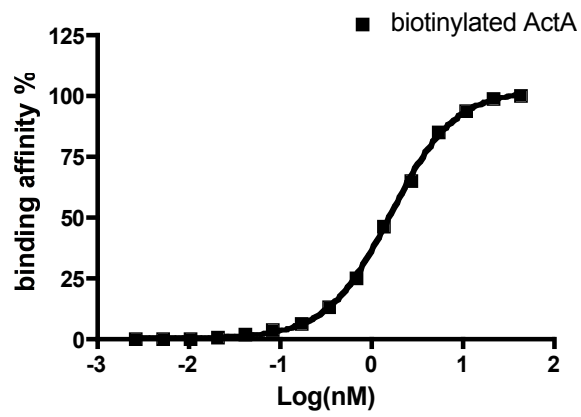

**B**

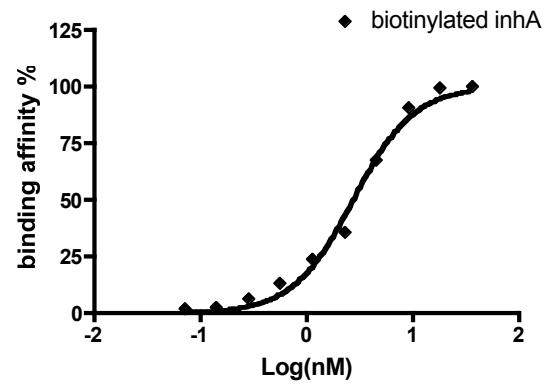

Supplement: pone.0009457.s007.pdf [file pone.0009457.s007.pdf]
