# Supplementary material for: Phylogenomic Analyses Reveal the Evolutionary Origin of the Inhibin α-Subunit, a Unique TGFβ Superfamily Antagonist
Source: PubMed Central journal article supplement (PMC2832003; doi:10.1371/journal.pone.0009457), 2010-03-04
Supplement: pone.0009457.s009.pdf [file pone.0009457.s009.pdf]

**Table S1. Species database information for TGFβ family members analyzed in Fig 1A and Fig 1B.**

| <b>Vertebrate</b>    |                            |                               |                            |                            |                            |                               |
|----------------------|----------------------------|-------------------------------|----------------------------|----------------------------|----------------------------|-------------------------------|
|                      | <i>Danio rerio</i>         | <i>Xenopus laevis</i>         | <i>Gallus gallus</i>       | <i>Mus musculus</i>        | <i>Homo sapiens</i>        |                               |
| AMH                  |                            |                               |                            | NP_031471                  | NP_000470                  |                               |
| GDF1                 |                            |                               |                            | NP_032133                  | NP_001483                  |                               |
| GDF3                 |                            |                               |                            | NP_032134                  | NP_065685                  |                               |
| GDF11                |                            |                               |                            | NP_034402                  | NP_005802                  |                               |
| Inhibin-alpha        | NP_001038669               | NP_001106341/<br>NP_001106349 | NP_001026428               | NP_034694                  | NP_002182                  |                               |
| Inhibin-beta         | A NP_001018166/ 56790252   | -                             | NP_990727                  | NP_032406                  | NP_002183                  |                               |
|                      | B NP_571143                | NP_001084055                  | NP_990537                  | NP_032407                  | NP_002184                  |                               |
|                      | C -                        | -                             | -                          | NP_034695                  | NP_005529                  |                               |
|                      | D XP_700865                | NP_001079333                  | -                          | -                          | -                          |                               |
|                      | E -                        | -                             | -                          | NP_032408                  | NP_113667                  |                               |
| Lefty                |                            |                               |                            | NP_034224/<br>NP_796073    | NP_003231/<br>NP_066277    |                               |
| Myostatin            |                            |                               |                            | NP_034964                  | NP_005250                  |                               |
| Nodal                |                            |                               |                            | NP_038639                  | NP_060525                  |                               |
| TGF-beta             | 1                          |                               |                            | NP_035707                  | NP_000651                  |                               |
|                      | 2                          |                               |                            | NP_033393                  | NP_003229/<br>NP_001129071 |                               |
|                      | 3                          |                               |                            | NP_033394                  | NP_003230                  |                               |
| <b>Insects</b>       |                            |                               |                            |                            |                            |                               |
|                      | Hymenoptera                |                               | Coleoptera                 | Diptera                    |                            |                               |
|                      | <i>Nasonia vitripennis</i> | <i>Apis mellifera</i>         | <i>Tribolium castaneum</i> | <i>Anopheles gambiae</i>   | <i>Aedes aegypti</i>       | <i>Culex quinquefasciatus</i> |
| Activin              | XP_001602284               | XP_001123044                  | XP_966908                  |                            |                            |                               |
| Activin-like protein |                            | XP_001122210                  | XP_970355                  |                            |                            |                               |
| Maverick             | XP_001606148               | XP_001122118                  |                            | XP_320452                  | XP_001656215               | XP_001870685                  |
| Myoglianin           |                            |                               |                            |                            |                            |                               |
| Myostatin            | XP_001602255               |                               | XP_966819                  | XP_309077                  | XP_001656630               | XP_001842764                  |
| <b>Drosophila</b>    |                            |                               |                            |                            |                            |                               |
|                      | <i>ananassae</i>           | <i>erecta</i>                 | <i>grimshawi</i>           | <i>melanogaster</i>        | <i>mojavensis</i>          | <i>persimilis</i>             |
| Activin              | XP_001967557               | XP_001982690                  | XP_001996489               | NP_651942                  | XP_002011430               | -                             |
| Activin-like protein | XP_001961464               | XP_001968468                  | XP_001993123               | NP_523461                  | XP_002002273               | XP_002028363                  |
| Maverick             | XP_001953456               | XP_001982717                  | -                          | NP_524626/<br>NP_001014690 | XP_002011465               | XP_002027069                  |
| Myoglianin           | XP_001966254               | XP_001982711                  | XP_001996544               | NP_524627                  | XP_002011400               | XP_002027072                  |
|                      | <i>pseudoobscura</i>       | <i>sechellia</i>              | <i>simulans</i>            | <i>viritis</i>             | <i>willistoni</i>          | <i>yakuba</i>                 |
| Activin              | XP_001352350               | XP_002044322                  | -                          | XP_002059698               | XP_002072630               | XP_002099638                  |
| Activin-like protein | XP_002133178               | XP_002037633                  | XP_002077940               | XP_002057795               | XP_002066964               | XP_002087729                  |
| Maverick             | XP_001352269               | XP_002043687                  | -                          | XP_002059723               | -                          | XP_002099611                  |
| Myoglianin           | XP_001352370               | XP_002043694                  | -                          | XP_002059743               | XP_002072620               | XP_002099617                  |
