# Supplementary material for: Phylogenomic Analyses Reveal the Evolutionary Origin of the Inhibin α-Subunit, a Unique TGFβ Superfamily Antagonist
Source: PubMed Central journal article supplement (PMC2832003; doi:10.1371/journal.pone.0009457), 2010-03-04
Supplement: pone.0009457.s010.pdf [file pone.0009457.s010.pdf]

**Table S2. Species database information for inhibin  $\alpha$ -subunit analysis in Fig 1A and Fig 1C.**

| Classification                            | Name                                                                  | Genbank or Ensembl ID                                    |                                                |                    |
|-------------------------------------------|-----------------------------------------------------------------------|----------------------------------------------------------|------------------------------------------------|--------------------|
|                                           | <i>Lepisosteus platyrhinchus</i> (Florida gar)                        | FJ457910                                                 |                                                |                    |
|                                           | <i>Oncorhynchus mykiss</i> (rainbow trout)                            | NP_001117672                                             |                                                |                    |
| Actinopterygii                            | Euteleostei                                                           | <i>Fundulus heteroclitus</i> (killifish)                 | AAW02847                                       |                    |
|                                           |                                                                       | <i>Oryzias latipes</i> (Japanese medaka)                 | ENSORLPO0000002713                             |                    |
|                                           | Teleostei                                                             | <i>Danio rerio</i> (zebrafish)                           | NP_001038669                                   |                    |
|                                           |                                                                       | <i>Pimephales promelas</i>                               | ABS30832                                       |                    |
|                                           |                                                                       | <i>Xenopus laevis</i> (African clawed frog)              | NP_001106349                                   |                    |
| Amphibia                                  | Anura                                                                 | <i>Xenopus tropicalis</i> (western clawed frog)          | NP_001027522                                   |                    |
|                                           | Crocodylidae                                                          | <i>Alligator mississippiensis</i> (American alligator)   | FJ457911                                       |                    |
| Sauropsida                                | Archosauria                                                           | <i>Gallus gallus</i> (chicken)                           | NP_001026428                                   |                    |
|                                           |                                                                       | <i>Meleagris gallopavo</i> (turkey)                      | AAK21264                                       |                    |
|                                           | Testudines                                                            | <i>Caretta caretta</i> (Loggerhead turtle)               | FJ457912                                       |                    |
|                                           |                                                                       | <i>Trachemys scripta</i> (red-eared slider turtle)       | FJ457913                                       |                    |
|                                           |                                                                       | <i>Anolis carolinensis</i> (green anole)                 | 120:3014921:3015701:1                          |                    |
|                                           | Squamata                                                              | <i>Sceloporus jarrovi</i>                                | FJ457914                                       |                    |
|                                           |                                                                       | <i>Epicrates cenchria</i> (Rainbow Boa)                  | FJ457915                                       |                    |
|                                           |                                                                       | <i>Python molurus bivittatus</i> (Burmese Python)        | FJ457916                                       |                    |
|                                           |                                                                       | <i>Python regius</i> (Ball pyson)                        | FJ457917                                       |                    |
|                                           | Monotremata                                                           | <i>Ornithorhynchus anatinus</i> (platypus)               | ENSOANP00000028722                             |                    |
| Metatheria                                | <i>Monodelphis domestica</i> (gray short-tailed opossum)              | XP_001362298                                             |                                                |                    |
|                                           | <i>Perameles gunnii</i> (eastern barred bandicoot)                    | FJ457918                                                 |                                                |                    |
|                                           | <i>Sminthopsis crassicaudata</i> (fat-tailed dunnart)                 | FJ457919                                                 |                                                |                    |
|                                           | <i>Macropus eugenii</i> (tammar wallaby)                              | FJ457920                                                 |                                                |                    |
|                                           | <i>Echinops telfairi</i> (small Madagascar hedgehog)                  | ENSETEP00000007737                                       |                                                |                    |
| Xenarthra                                 | <i>Dasybus novemcinctus</i> (nine-banded armadillo)                   | ENSDNOP00000003040                                       |                                                |                    |
| Mammalia                                  | Insectivora                                                           | <i>Erinaceus europaeus</i> (western European hedgehog)   | ENSEEUP00000012588                             |                    |
|                                           |                                                                       | <i>Sorex araneus</i> (European shrew)                    | ACE77661                                       |                    |
|                                           | Chiroptera                                                            | <i>Myotis lucifugus</i> (little brown bat)               | ENSMLUP00000009480                             |                    |
|                                           |                                                                       | <i>Rhinolophus ferrumequinum</i> (greater horseshoe bat) | ACC64569                                       |                    |
|                                           | Carnivora                                                             | <i>Canis lupus familiaris</i> (dog)                      | XP_545660                                      |                    |
|                                           |                                                                       | <i>Felis catus</i> (domestic cat)                        | AAP83317                                       |                    |
|                                           | Perissodactyla                                                        | <i>Equus caballus</i> (horse)                            | NP_001075379                                   |                    |
|                                           |                                                                       | <i>Sus scrofa</i> (Pigliucci)                            | NP_999354                                      |                    |
|                                           |                                                                       | <i>Bos taurus</i> (cattle)                               | P07994                                         |                    |
|                                           | Cetartiodactyla                                                       | <i>Capra hircus</i> (goat)                               | ABR13682                                       |                    |
|                                           |                                                                       | <i>Ovis aries</i> (sheep)                                | P38440                                         |                    |
|                                           |                                                                       | Eutheria                                                 | <i>Otolemur garnettii</i> (small-eared galago) | ENSOGAP00000000591 |
|                                           |                                                                       |                                                          | <i>Microcebus murinus</i> (gray mouse lemur)   | ENSMICP00000007418 |
|                                           | <i>Callithrix jacchus</i> (white-tufted-ear marmoset)                 |                                                          | ABY89812                                       |                    |
|                                           | Primates                                                              | <i>Macaca mulatta</i> (rhesus monkey)                    | NP_001028127                                   |                    |
| <i>Papio anubis</i> (olive baboon)        |                                                                       | ABY67214                                                 |                                                |                    |
| <i>Pongo pygmaeus</i> (Bornean orangutan) |                                                                       | ENSPPYP00000014765                                       |                                                |                    |
| <i>Homo sapiens</i> (human)               |                                                                       | NP_002182                                                |                                                |                    |
| <i>Pan troglodytes</i> (chimpanzee)       |                                                                       | XP_001148064                                             |                                                |                    |
| Lagomorpha                                | <i>Ochotona princeps</i> (American pika)                              | ENSOPRP00000009166                                       |                                                |                    |
|                                           | <i>Oryctolagus cuniculus</i> (rabbit)                                 | ENSOCUP00000009768                                       |                                                |                    |
| Rodentia                                  | <i>Spermophilus tridecemlineatus</i> (thirteen-lined ground squirrel) | ENSSTOP00000011140                                       |                                                |                    |
|                                           | <i>Mesocricetus auratus</i> (golden hamster)                          | BAD95496                                                 |                                                |                    |
|                                           | <i>Phodopus sungorus</i> (Siberian hamsters)                          | AAL67332                                                 |                                                |                    |
|                                           | <i>Mus musculus</i> (house mouse)                                     | NP_034694                                                |                                                |                    |
|                                           | <i>Rattus norvegicus</i> (Norway rat)                                 | NP_036722                                                |                                                |                    |
