# Supplementary material for: Phylogenomic Analyses Reveal the Evolutionary Origin of the Inhibin α-Subunit, a Unique TGFβ Superfamily Antagonist
Source: PubMed Central journal article supplement (PMC2832003; doi:10.1371/journal.pone.0009457), 2010-03-04
Supplement: pone.0009457.s011.pdf [file pone.0009457.s011.pdf]

**Table S3. Oligonucleotide primers used for deletion mutagenesis.**

| <b>Primer</b>                        | <b>Sequence</b>                      |
|--------------------------------------|--------------------------------------|
| $\alpha^{\text{Hex}t-}$ forward      | TCAACTCCCCTGATGGCCAACTGCCACAGAGTAGC  |
| $\alpha^{\text{Hex}t-}$ reverse      | GCTACTCTGTGGCAGTTGGCCATCAGGGGAGTTGA  |
| $\alpha^{\text{HPWR-}}$ forward      | TGTGGGCTGCACATCTACTCCTTGCTGCCAGGGGC  |
| $\alpha^{\text{HPWR-}}$ reverse      | GCCCCTGGCAGCAAGGAGTAGATGTGCAGCCCACAG |
| $\beta\text{A}^{\text{WHD}}$ forward | GAGGGTGAGTGCCCGAGCTGCTGTGTGCCACCAAG  |
| $\beta\text{A}^{\text{WHD}}$ reverse | CTTGGTGGGCACACAGCAGCTCGGGCACTCACCTC  |
